# Supplementary material
Source: MDPI journal article supplement (https://www.mdpi.com/2071-1050/9/9/1519)
Supplement: s1 [file s1]

**Instrument Title: “Semi-structured interview”**  
Total Participant time required: **30-40 minutes**

The purpose of the study is to identify drivers and proximate causes of the excision of land of the Protective Forest Corazón de Oro. Please feel free to respond or not any of the following questions.

**Group 1. Local residents and community leaders**

1. Historia de poblamiento-colonización (*Settlement history-colonization*)

- ¿Cuándo y desde dónde llegaron los primeros pobladores a esta zona? Hubo haciendas anteriormente? (*When and from which locations did the first colonists come to this area? Was there any form of agrarian holding?*)
- ¿Qué actividades económicas hacían los primeros colonos? ¿Cómo fueron cambiando? (*Which type of economic activities did the first colonists carry on? How have these activities change with time?*)
- ¿Cuándo se crearon los poblados? (El Tibio, Los Guabos, Imbana, etc.) ¿Podría darnos detalles de cómo fueron adquiriendo servicios básicos? Ej. Escuelas, puestos médicos, iglesias? (*When were settlements founded? How did they get basic services and infrastructure?*)
- ¿Cómo se fueron construyendo carreteras? (*How has accessibility and roads changed?*)

2. Relación con áreas protegidas (*Relation to protected areas*)

- ¿Conoce sobre la existencia de áreas protegidas? Por ejemplo, ¿el Parque Nacional Podocarpus o el Bosque protector Corazón de Oro? ¿desde cuando? ¿Do you know about the existence of protected areas, such as the Podocarpus National Park or the Protective Forest Corazón de Oro?
- ¿Tuvo suficiente información sobre la creación de estas áreas protegidas? (*Did you get enough information about these protected areas when they were created?*)
- ¿La existencia del bosque protector ha traído algún cambio en sus actividades productivas? (The existence of the protective forest has changed some of your productive activities?)

3. Titulación de tierras (*Land titling*)

- ¿Ha tratado de sacar escrituras de sus terrenos en los últimos 4 años? ¿Dónde ha hecho la solicitud? (*Have you tried to get a land title in the past 4 years? Where have you made the solicitude?*)
- ¿Conoce usted de problemas para sacar los títulos de propiedad de los terrenos o para vender o entregar en herencia terrenos? (*Have you experienced or do you know about problems to obtain land titles?*)
- ¿Por qué existen estos problemas? (*Do you know why these problems exist?*)

**Group 2. Governmental officers – Group 3. Employees of local NGOs**

1. Titulación de tierras

- ¿Cuáles son las razones que impiden otorgar títulos de propiedad o hacer transacciones con los terrenos dentro del Bosque Protector Corazón de Oro? (*What are the reasons that do not allow to provide land titles or to make land transactions in the protective forest Corazón de Oro?*)

- ¿Cómo ha cambiado el proceso de titulación de terrenos desde la existencia del IERAC, INDA hasta la STRA? (*How has the titling process changed between IERAC, INDA, STRA?*)
- ¿Cómo es el proceso de titulación en el Ministerio del Ambiente? (*How is the titling process in the Ministry of the Environment?*)
- ¿Por qué se divide la competencia de legalización entre el Ministerio del Ambiente y el INDA? (*Why were competences for land titling divided between the Ministry of the Environment and INDA?*)
- ¿Qué formas de conflicto han existido con los pobladores por los títulos de propiedad? What forms of conflicts have been with the local residents because of the land titles?
- ¿Qué soluciones han pensado estos conflictos? (*What solutions have been discussed?*)

## 2. Desmembración

- ¿Cuáles fueron las causas inmediatas a la desmembración del Bosque Protector corazón de Oro? (*What were the proximate causes for the downsizing of the PFCO?*)
- ¿Por qué se optó por la desmembración y no por la titulación individual de los casos con problemas? (*Why was downsizing instead of individual titling selected to solve the conflicts*)
- ¿Cuál fue el proceso técnico y legal para la desmembración? ¿Quiénes participaron? *How was the legal and technical process for downsizing? Who participated?*
- ¿Qué efectos ha tenido la desmembración para fines de conservación y para la población local? (*What effects have brought downsizing for conservation and for the local residents?*)

### **Group 3. Employess of local NGOs**

- ¿En su opinión, Por qué se originan estos problemas? Por qué no se ha dado solución a ellos?
- ¿En su opinión, cual hubiese sido una alternativa a la desmembración para el problema de la titulación, y para que los objetivos de conservación se cumplan?
